# Supplementary material
Source: PubMed Central journal article supplement (PMC8102043)
Supplement: mmc1.pdf [file mmc1.pdf]

# THE LANCET

## Respiratory Medicine

### Supplementary appendix

This appendix formed part of the original submission and has been peer reviewed. We post it as supplied by the authors.

Supplement to: Hamilton F, Arnold D, Bzdek BR, et al. Aerosol generating procedures: are they of relevance for transmission of SARS-CoV-2? *Lancet Respir Med* 2021; published online May 6. [http://dx.doi.org/10.1016/S2213-2600\(21\)00216-2](http://dx.doi.org/10.1016/S2213-2600(21)00216-2).

**AERATOR group members**

Carrie White  
James Murray  
Johannes Keller  
Jules Brown  
Andrew Shrimpton  
Anthony Pickering  
Timothy Cook  
Mark Gormley  
David Arnold  
George Nava  
Jonathan Reid  
Bryan R Bzdek  
Sadiyah Sheikh  
Florence Gregson  
Fergus Hamilton  
Nick Maskell  
James Dodd  
Ed Moran
